# Supplementary material for: Feasibility of intravitreal injections and ophthalmic safety assessment in marmoset (Callithrix jacchus) monkeys
Source: PubMed Central journal article supplement (PMC7041524; doi:10.5194/pb-4-93-2017), 2017-04-28
Supplement: pb-4-93-supplement.pdf [file pb-4-93-supplement.pdf]

Supplement of Primate Biol., 4, 93–100, 2017  
<http://www.primate-biol.net/4/93/2017/>  
doi:10.5194/pb-4-93-2017-supplement  
© Author(s) 2017. CC Attribution 3.0 License.

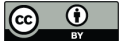

Primate  
Biology  Open Access

*Supplement of*

## **Feasibility of intravitreal injections and ophthalmic safety assessment in marmoset (*Callithrix jacchus*) monkeys**

**Birgit Korbmacher et al.**

*Correspondence to:* Birgit Korbmacher ([birgit.korbmacher@covance.com](mailto:birgit.korbmacher@covance.com), [birgit.niggemann@covance.com](mailto:birgit.niggemann@covance.com))

The copyright of individual parts of the supplement might differ from the CC-BY 3.0 licence.

Table  
Individual Electroretinogram

| Test Item (dosage)                             |        | 1 2                                                                     |                        |                        |                        |                        |                        |                        |                        |                        |                        |                        |                        |
|------------------------------------------------|--------|-------------------------------------------------------------------------|------------------------|------------------------|------------------------|------------------------|------------------------|------------------------|------------------------|------------------------|------------------------|------------------------|------------------------|
| µL/both eyes bi-weekly (days 1, 15, 29 and 43) |        | 10                                                                      | 20                     |                        |                        |                        |                        |                        |                        |                        |                        |                        |                        |
| Phase                                          |        | Predose 1                                                               |                        |                        |                        |                        |                        |                        |                        |                        |                        |                        |                        |
|                                                |        | Scotopic Measurement - b-Wave White Flash Rod Response - Amplitude (µV) |                        |                        |                        |                        |                        |                        |                        |                        |                        |                        |                        |
|                                                |        | L e f t E y e                                                           |                        |                        |                        |                        | R i g h t E y e        |                        |                        |                        |                        |                        |                        |
| Group/Animal                                   |        | 9.5                                                                     | 30                     | 95                     | 300                    | 950                    | 3000                   | 9.5                    | 30                     | 95                     | 300                    | 950                    | 3000                   |
| Sex                                            | Number | (mcds/m <sup>2</sup> )                                                  | (mcds/m <sup>2</sup> ) | (mcds/m <sup>2</sup> ) | (mcds/m <sup>2</sup> ) | (mcds/m <sup>2</sup> ) | (mcds/m <sup>2</sup> ) | (mcds/m <sup>2</sup> ) | (mcds/m <sup>2</sup> ) | (mcds/m <sup>2</sup> ) | (mcds/m <sup>2</sup> ) | (mcds/m <sup>2</sup> ) | (mcds/m <sup>2</sup> ) |
| 1/M                                            | 45366M | b                                                                       | b                      | b                      | b                      | b                      | b                      | 25.7                   | 34.5                   | 75.2                   | 134.0                  | 175.0                  | 215.0                  |
|                                                | 45427M | b                                                                       | b                      | b                      | b                      | b                      | b                      | 42.0                   | 44.6                   | 102.0                  | 134.0                  | 206.0                  | 184.0                  |
|                                                | 45504M | b                                                                       | b                      | b                      | b                      | b                      | b                      | 90.2                   | 110.0                  | 143.0                  | 234.0                  | 316.0                  | 323.0                  |
|                                                | Mean   | -                                                                       | -                      | -                      | -                      | -                      | -                      | 52.6                   | 63.0                   | 106.7                  | 167.3                  | 232.3                  | 240.7                  |
|                                                | SD     | -                                                                       | -                      | -                      | -                      | -                      | -                      | 33.5                   | 41.0                   | 34.1                   | 57.7                   | 74.1                   | 73.0                   |
|                                                | N      | -                                                                       | -                      | -                      | -                      | -                      | -                      | 3                      | 3                      | 3                      | 3                      | 3                      | 3                      |
| 2/M                                            | 42737M | b                                                                       | b                      | b                      | b                      | b                      | b                      | 38.4                   | 47.5                   | 94.1                   | 118.0                  | 188.0                  | 209.0                  |
|                                                | 45370M | b                                                                       | b                      | b                      | b                      | b                      | b                      | 48.8                   | 73.6                   | 76.8                   | 135.0                  | 163.0                  | 218.0                  |
|                                                | 45500M | b                                                                       | b                      | b                      | b                      | b                      | b                      | 33.2                   | 42.3                   | 67.7                   | 97.7                   | 155.0                  | 169.0                  |
|                                                | Mean   | -                                                                       | -                      | -                      | -                      | -                      | -                      | 40.1                   | 54.5                   | 79.5                   | 116.9                  | 168.7                  | 198.7                  |
|                                                | SD     | -                                                                       | -                      | -                      | -                      | -                      | -                      | 7.9                    | 16.8                   | 13.4                   | 18.7                   | 17.2                   | 26.1                   |
|                                                | N      | -                                                                       | -                      | -                      | -                      | -                      | -                      | 3                      | 3                      | 3                      | 3                      | 3                      | 3                      |

b = Not taken due to maximum sedation time was over





Table  
Individual Electroretinogram

| Test Item (dosage)                             |        | 1 2                                                                        |                        |                        |                        |                        |                        |                        |                        |                        |                        |                        |                        |
|------------------------------------------------|--------|----------------------------------------------------------------------------|------------------------|------------------------|------------------------|------------------------|------------------------|------------------------|------------------------|------------------------|------------------------|------------------------|------------------------|
| µL/both eyes bi-weekly (days 1, 15, 29 and 43) |        | 10                                                                         | 20                     |                        |                        |                        |                        |                        |                        |                        |                        |                        |                        |
| Phase                                          |        | Predose 1                                                                  |                        |                        |                        |                        |                        |                        |                        |                        |                        |                        |                        |
|                                                |        | Scotopic Measurement - b-Wave White Flash Rod Response - Peak Latency (ms) |                        |                        |                        |                        |                        |                        |                        |                        |                        |                        |                        |
|                                                |        | L e f t E y e                                                              |                        |                        |                        |                        | R i g h t E y e        |                        |                        |                        |                        |                        |                        |
| Group                                          | Animal | 9.5                                                                        | 30                     | 95                     | 300                    | 950                    | 3000                   | 9.5                    | 30                     | 95                     | 300                    | 950                    | 3000                   |
| Sex                                            | Number | (mcDs/m <sup>2</sup> )                                                     | (mcDs/m <sup>2</sup> ) | (mcDs/m <sup>2</sup> ) | (mcDs/m <sup>2</sup> ) | (mcDs/m <sup>2</sup> ) | (mcDs/m <sup>2</sup> ) | (mcDs/m <sup>2</sup> ) | (mcDs/m <sup>2</sup> ) | (mcDs/m <sup>2</sup> ) | (mcDs/m <sup>2</sup> ) | (mcDs/m <sup>2</sup> ) | (mcDs/m <sup>2</sup> ) |
| 1/M                                            | 45366M | b                                                                          | b                      | b                      | b                      | b                      | b                      | 70.3                   | 55.5                   | 34.3                   | 32.8                   | 30.5                   | 29.8                   |
|                                                | 45427M | b                                                                          | b                      | b                      | b                      | b                      | b                      | 57.3                   | 44.3                   | 34.3                   | 32.8                   | 33.0                   | 31.5                   |
|                                                | 45504M | b                                                                          | b                      | b                      | b                      | b                      | b                      | 54.0                   | 41.0                   | 38.8                   | 33.8                   | 34.3                   | 35.3                   |
|                                                | Mean   | -                                                                          | -                      | -                      | -                      | -                      | -                      | 60.5                   | 46.9                   | 35.8                   | 33.1                   | 32.6                   | 32.2                   |
|                                                | SD     | -                                                                          | -                      | -                      | -                      | -                      | -                      | 8.6                    | 7.6                    | 2.6                    | 0.6                    | 1.9                    | 2.8                    |
|                                                | N      | -                                                                          | -                      | -                      | -                      | -                      | -                      | 3                      | 3                      | 3                      | 3                      | 3                      | 3                      |
| 2/M                                            | 42737M | b                                                                          | b                      | b                      | b                      | b                      | b                      | 56.5                   | 47.5                   | 35.5                   | 33.0                   | 33.5                   | 34.3                   |
|                                                | 45370M | b                                                                          | b                      | b                      | b                      | b                      | b                      | 79.0                   | 59.5                   | 38.8                   | 32.3                   | 30.5                   | 30.3                   |
|                                                | 45500M | b                                                                          | b                      | b                      | b                      | b                      | b                      | 64.3                   | 49.3                   | 40.5                   | 35.8                   | 35.0                   | 35.8                   |
|                                                | Mean   | -                                                                          | -                      | -                      | -                      | -                      | -                      | 66.6                   | 52.1                   | 38.3                   | 33.7                   | 33.0                   | 33.5                   |
|                                                | SD     | -                                                                          | -                      | -                      | -                      | -                      | -                      | 11.4                   | 6.5                    | 2.5                    | 1.9                    | 2.3                    | 2.8                    |
|                                                | N      | -                                                                          | -                      | -                      | -                      | -                      | -                      | 3                      | 3                      | 3                      | 3                      | 3                      | 3                      |

b = Not taken due to maximum sedation time was over





Table  
Individual Electroretinogram

| Test Item (dosage)                             |        | 1                                                                                  |           | 2                 |           |                |           |                   |           |
|------------------------------------------------|--------|------------------------------------------------------------------------------------|-----------|-------------------|-----------|----------------|-----------|-------------------|-----------|
| µL/both eyes bi-weekly (days 1, 15, 29 and 43) |        | 10                                                                                 |           | 20                |           |                |           |                   |           |
| Phase                                          |        | Predose 1                                                                          |           |                   |           | Predose 2      |           |                   |           |
|                                                |        | Scotopic Measurement - a-Wave White Flash Rod Response (3000 mcDs/m <sup>2</sup> ) |           |                   |           |                |           |                   |           |
| Group/Animal                                   |        | Amplitude (µV)                                                                     |           | Peak Latency (ms) |           | Amplitude (µV) |           | Peak Latency (ms) |           |
| Sex                                            | Number | Left Eye                                                                           | Right Eye | Left Eye          | Right Eye | Left Eye       | Right Eye | Left Eye          | Right Eye |
| 1/M                                            | 45366M | b                                                                                  | 121.0     | b                 | 13.5      | 98.6           | 118.0     | 14.5              | 14.3      |
|                                                | 45427M | b                                                                                  | 132.0     | b                 | 13.8      | 117.0          | 118.0     | 16.0              | 15.0      |
|                                                | 45504M | b                                                                                  | 177.0     | b                 | 13.5      | 180.0          | 134.0     | 14.5              | 14.5      |
|                                                | Mean   | -                                                                                  | 143.3     | -                 | 13.6      | 131.9          | 123.3     | 15.0              | 14.6      |
|                                                | SD     | -                                                                                  | 29.7      | -                 | 0.2       | 42.7           | 9.2       | 0.9               | 0.4       |
|                                                | N      | -                                                                                  | 3         | -                 | 3         | 3              | 3         | 3                 | 3         |
|                                                | 2/M    | 42737M                                                                             | b         | 123.0             | b         | 13.8           | 139.0     | 128.0             | 14.0      |
|                                                | 45370M | b                                                                                  | 199.0     | b                 | 14.0      | 148.0          | 114.0     | 16.3              | 19.5      |
|                                                | 45500M | b                                                                                  | 104.0     | b                 | 14.8      | 118.0          | 122.0     | 14.5              | 14.8      |
|                                                | Mean   | -                                                                                  | 142.0     | -                 | 14.2      | 135.0          | 121.3     | 14.9              | 16.0      |
|                                                | SD     | -                                                                                  | 50.3      | -                 | 0.5       | 15.4           | 7.0       | 1.2               | 3.0       |
|                                                | N      | -                                                                                  | 3         | -                 | 3         | 3              | 3         | 3                 | 3         |

b = Not taken due to maximum sedation time was over



Table  
Individual Electroretinogram

| Test Item (dosage)                                                                 |        | 1              | 2         |                   |           |
|------------------------------------------------------------------------------------|--------|----------------|-----------|-------------------|-----------|
| µL/both eyes bi-weekly (days 1, 15, 29 and 43)                                     |        | 10             | 20        |                   |           |
| Phase                                                                              |        | Dosing Week 6  |           |                   |           |
| Scotopic Measurement - a-Wave White Flash Rod Response (3000 mcDs/m <sup>2</sup> ) |        |                |           |                   |           |
| Group/Animal                                                                       |        | Amplitude (µV) |           | Peak Latency (ms) |           |
| Sex                                                                                | Number | Left Eye       | Right Eye | Left Eye          | Right Eye |
| 1/M                                                                                | 45366M | 93.8           | 117.0     | 15.3              | 15.0      |
|                                                                                    | 45427M | 159.0          | 149.0     | 14.3              | 14.0      |
|                                                                                    | 45504M | 60.2           | 124.0     | 15.0              | 14.3      |
|                                                                                    | Mean   | 104.3          | 130.0     | 14.9              | 14.4      |
|                                                                                    | SD     | 50.2           | 16.8      | 0.5               | 0.5       |
|                                                                                    | N      | 3              | 3         | 3                 | 3         |
| 2/M                                                                                | 42737M | 157.0          | 170.0     | 14.3              | 14.5      |
|                                                                                    | 45370M | 180.0          | 178.0     | 16.3              | 16.0      |
|                                                                                    | 45500M | 119.0          | 66.1      | 15.5              | 15.5      |
|                                                                                    | Mean   | 152.0          | 138.0     | 15.4              | 15.3      |
|                                                                                    | SD     | 30.8           | 62.4      | 1.0               | 0.8       |
|                                                                                    | N      | 3              | 3         | 3                 | 3         |

Table  
Individual Electroretinogram

| Test Item    |        | (dosage)                                                                  |       | 1    | 2     |                   |       |      |       |
|--------------|--------|---------------------------------------------------------------------------|-------|------|-------|-------------------|-------|------|-------|
| μL/both eyes |        | bi-weekly (days 1, 15, 29 and 43)                                         |       | 10   | 20    |                   |       |      |       |
| Phase        |        | Predose 1                                                                 |       |      |       | Predose 2         |       |      |       |
|              |        | Scotopic Measurement - Oscillatory Potentials (3000 mcDs/m <sup>2</sup> ) |       |      |       |                   |       |      |       |
| Group/Animal |        | Amplitude (μV)                                                            |       |      |       | Amplitude (μV)    |       |      |       |
|              |        | Peak Latency (ms)                                                         |       |      |       | Peak Latency (ms) |       |      |       |
| Sex          | Number | Left                                                                      | Right | Left | Right | Left              | Right | Left | Right |
|              |        | Eye                                                                       | Eye   | Eye  | Eye   | Eye               | Eye   | Eye  | Eye   |
| 1/M          | 45366M | b                                                                         | 12.3  | b    | 22.0  | 4.6               | 9.8   | 22.8 | 22.9  |
|              | 45427M | b                                                                         | 23.4  | b    | 22.2  | 9.6               | 9.3   | 26.3 | 24.7  |
|              | 45504M | b                                                                         | 39.7  | b    | 22.9  | 25.2              | 28.0  | 24.1 | 24.3  |
|              | Mean   | -                                                                         | 25.1  | -    | 22.4  | 13.1              | 15.7  | 24.4 | 24.0  |
|              | SD     | -                                                                         | 13.8  | -    | 0.5   | 10.8              | 10.6  | 1.8  | 0.9   |
|              | N      | -                                                                         | 3     | -    | 3     | 3                 | 3     | 3    | 3     |
| 2/M          | 42737M | b                                                                         | 13.9  | b    | 22.7  | 24.3              | 21.6  | 22.5 | 22.3  |
|              | 45370M | b                                                                         | 18.7  | b    | 22.7  | 16.6              | 17.2  | 20.8 | 23.6  |
|              | 45500M | b                                                                         | 11.8  | b    | 27.5  | 8.8               | 7.9   | 23.9 | 24.0  |
|              | Mean   | -                                                                         | 14.8  | -    | 24.3  | 16.6              | 15.6  | 22.4 | 23.3  |
|              | SD     | -                                                                         | 3.5   | -    | 2.8   | 7.7               | 7.0   | 1.6  | 0.9   |
|              | N      | -                                                                         | 3     | -    | 3     | 3                 | 3     | 3    | 3     |

b = Not taken due to maximum sedation time was over

Table  
Individual Electroretinogram

| Test Item                                      |        | (dosage)                                                                  |           | 1                 | 2         |
|------------------------------------------------|--------|---------------------------------------------------------------------------|-----------|-------------------|-----------|
| μL/both eyes bi-weekly (days 1, 15, 29 and 43) |        |                                                                           |           | 10                | 20        |
| Phase                                          |        | Dosing Week 6                                                             |           |                   |           |
|                                                |        | Scotopic Measurement - Oscillatory Potentials (3000 mcDs/m <sup>2</sup> ) |           |                   |           |
| Group/Animal                                   |        | Amplitude (μV)                                                            |           | Peak Latency (ms) |           |
| Sex                                            | Number | Left Eye                                                                  | Right Eye | Left Eye          | Right Eye |
| 1/M                                            | 45366M | 9.0                                                                       | 12.8      | 27.7              | 28.7      |
|                                                | 45427M | 15.2                                                                      | 13.3      | 22.9              | 23.0      |
|                                                | 45504M | 13.7                                                                      | 28.9      | 26.4              | 25.3      |
|                                                | Mean   | 12.6                                                                      | 18.3      | 25.7              | 25.7      |
|                                                | SD     | 3.2                                                                       | 9.2       | 2.5               | 2.9       |
|                                                | N      | 3                                                                         | 3         | 3                 | 3         |
|                                                | 2/M    | 42737M                                                                    | 22.9      | 24.7              | 25.5      |
|                                                | 45370M | 23.4                                                                      | 16.0      | 29.1              | 28.6      |
|                                                | 45500M | 14.1                                                                      | 8.4       | 27.8              | 26.8      |
|                                                | Mean   | 20.1                                                                      | 16.4      | 27.5              | 26.8      |
|                                                | SD     | 5.2                                                                       | 8.2       | 1.8               | 1.8       |
|                                                | N      | 3                                                                         | 3         | 3                 | 3         |

Table  
Individual Electroretinogram

| Test Item (dosage)                             |            | 1                                                       |           | 2        |           |           |           |          |           |
|------------------------------------------------|------------|---------------------------------------------------------|-----------|----------|-----------|-----------|-----------|----------|-----------|
| µL/both eyes bi-weekly (days 1, 15, 29 and 43) |            | 10                                                      |           | 20       |           |           |           |          |           |
| Phase                                          |            | Predose 1                                               |           |          |           | Predose 2 |           |          |           |
|                                                |            | Photopic Measurement - Flicker (30 Hz) - Amplitude (µV) |           |          |           |           |           |          |           |
|                                                |            | 0 min                                                   |           | 10 min   |           | 0 min     |           | 10 min   |           |
| Group/Animal                                   | Sex Number | Left Eye                                                | Right Eye | Left Eye | Right Eye | Left Eye  | Right Eye | Left Eye | Right Eye |
| 1/M                                            | 45366M     | b                                                       | 118.0     | b        | 167.0     | 93.3      | 112.0     | 107.0    | 146.0     |
|                                                | 45427M     | b                                                       | 109.0     | b        | 155.0     | 68.2      | 109.0     | 119.0    | 149.0     |
|                                                | 45504M     | b                                                       | 183.0     | b        | 223.0     | 190.0     | 151.0     | 176.0    | 140.0     |
|                                                | Mean       | -                                                       | 136.7     | -        | 181.7     | 117.2     | 124.0     | 134.0    | 145.0     |
|                                                | SD         | -                                                       | 40.4      | -        | 36.3      | 64.3      | 23.4      | 36.9     | 4.6       |
|                                                | N          | -                                                       | 3         | -        | 3         | 3         | 3         | 3        | 3         |
| 2/M                                            | 42737M     | b                                                       | 134.0     | b        | 172.0     | 205.0     | 193.0     | 238.0    | 219.0     |
|                                                | 45370M     | b                                                       | 134.0     | b        | 192.0     | 111.0     | 75.4      | 122.0    | 86.4      |
|                                                | 45500M     | b                                                       | 97.0      | b        | 110.0     | 113.0     | 113.0     | 88.1     | 115.0     |
|                                                | Mean       | -                                                       | 121.7     | -        | 158.0     | 143.0     | 127.1     | 149.4    | 140.1     |
|                                                | SD         | -                                                       | 21.4      | -        | 42.8      | 53.7      | 60.1      | 78.6     | 69.8      |
|                                                | N          | -                                                       | 3         | -        | 3         | 3         | 3         | 3        | 3         |

b = Not taken due to maximum sedation time was over

Table  
Individual Electroretinogram

| Test Item (dosage)                                      |        | 1        |           | 2        |           |
|---------------------------------------------------------|--------|----------|-----------|----------|-----------|
| µL/both eyes bi-weekly (days 1, 15, 29 and 43)          |        | 10       |           | 20       |           |
| Dosing Week 6                                           |        |          |           |          |           |
| Photopic Measurement - Flicker (30 Hz) - Amplitude (µV) |        |          |           |          |           |
| Group/Animal<br>Sex                                     | Number | 0 min    |           | 10 min   |           |
|                                                         |        | Left Eye | Right Eye | Left Eye | Right Eye |
| 1/M                                                     | 45366M | 72.3     | 98.3      | 97.8     | 135.0     |
|                                                         | 45427M | 118.0    | 126.0     | 158.0    | 173.0     |
|                                                         | 45504M | 91.6     | 139.0     | 207.0    | 181.0     |
|                                                         | Mean   | 94.0     | 121.1     | 154.3    | 163.0     |
|                                                         | SD     | 22.9     | 20.8      | 54.7     | 24.6      |
|                                                         | N      | 3        | 3         | 3        | 3         |
| 2/M                                                     | 42737M | 156.0    | 169.0     | 186.0    | 225.0     |
|                                                         | 45370M | 111.0    | 104.0     | 120.0    | 123.0     |
|                                                         | 45500M | 95.1     | 58.1      | 75.8     | 50.0      |
|                                                         | Mean   | 120.7    | 110.4     | 127.3    | 132.7     |
|                                                         | SD     | 31.6     | 55.7      | 55.5     | 87.9      |
|                                                         | N      | 3        | 3         | 3        | 3         |

Table  
Individual Electroretinogram

| Test Item (dosage)                             |            | 1                                                          |           | 2        |           |           |           |          |           |
|------------------------------------------------|------------|------------------------------------------------------------|-----------|----------|-----------|-----------|-----------|----------|-----------|
| µL/both eyes bi-weekly (days 1, 15, 29 and 43) |            | 10                                                         |           | 20       |           |           |           |          |           |
| Phase                                          |            | Predose 1                                                  |           |          |           | Predose 2 |           |          |           |
|                                                |            | Photopic Measurement - Flicker (30 Hz) - Peak Latency (ms) |           |          |           |           |           |          |           |
|                                                |            | 0 min                                                      |           | 10 min   |           | 0 min     |           | 10 min   |           |
| Group/Animal                                   | Sex Number | Left Eye                                                   | Right Eye | Left Eye | Right Eye | Left Eye  | Right Eye | Left Eye | Right Eye |
| 1/M                                            | 45366M     | -                                                          | 56.4      | -        | 57.0      | 57.4      | 57.4      | 57.4     | 57.4      |
|                                                | 45427M     | -                                                          | 57.0      | -        | 58.8      | 59.0      | 58.0      | 58.0     | 58.0      |
|                                                | 45504M     | -                                                          | 57.4      | -        | 57.4      | 57.8      | 58.0      | 58.0     | 58.4      |
|                                                | Mean       | -                                                          | 56.9      | -        | 57.7      | 58.1      | 57.8      | 57.8     | 57.9      |
|                                                | SD         | -                                                          | 0.5       | -        | 0.9       | 0.8       | 0.3       | 0.3      | 0.5       |
|                                                | N          | -                                                          | 3         | -        | 3         | 3         | 3         | 3        | 3         |
| 2/M                                            | 42737M     | -                                                          | 58.2      | -        | 57.6      | 56.6      | 56.4      | 56.4     | 56.2      |
|                                                | 45370M     | -                                                          | 57.4      | -        | 57.4      | 59.6      | 60.0      | 60.0     | 59.4      |
|                                                | 45500M     | -                                                          | 57.8      | -        | 58.4      | 58.0      | 58.0      | 58.0     | 58.0      |
|                                                | Mean       | -                                                          | 57.8      | -        | 57.8      | 58.1      | 58.1      | 58.1     | 57.9      |
|                                                | SD         | -                                                          | 0.4       | -        | 0.5       | 1.5       | 1.8       | 1.8      | 1.6       |
|                                                | N          | -                                                          | 3         | -        | 3         | 3         | 3         | 3        | 3         |

Table  
Individual Electroretinogram

| Test Item (dosage)                                         |     | 1      |          | 2         |          |           |
|------------------------------------------------------------|-----|--------|----------|-----------|----------|-----------|
| µL/both eyes bi-weekly (days 1, 15, 29 and 43)             |     | 10     |          | 20        |          |           |
| Dosing Week 6                                              |     |        |          |           |          |           |
| Photopic Measurement - Flicker (30 Hz) - Peak Latency (ms) |     |        |          |           |          |           |
| Group/Animal                                               | Sex | Number | 0 min    |           | 10 min   |           |
|                                                            |     |        | Left Eye | Right Eye | Left Eye | Right Eye |
| 1/M                                                        |     | 45366M | 58.6     | 58.6      | 59.0     | 59.0      |
|                                                            |     | 45427M | 58.2     | 58.2      | 58.0     | 58.0      |
|                                                            |     | 45504M | 58.2     | 58.6      | 57.8     | 57.6      |
|                                                            |     | Mean   | 58.3     | 58.5      | 58.3     | 58.2      |
|                                                            |     | SD     | 0.2      | 0.2       | 0.6      | 0.7       |
|                                                            |     | N      | 3        | 3         | 3        | 3         |
|                                                            | 2/M |        | 42737M   | 57.6      | 57.6     | 57.2      |
| 45370M                                                     |     |        | 60.0     | 59.8      | 60.6     | 60.8      |
| 45500M                                                     |     |        | 59.4     | 59.4      | 59.8     | 59.4      |
|                                                            |     | Mean   | 59.0     | 58.9      | 59.2     | 59.0      |
|                                                            |     | SD     | 1.2      | 1.2       | 1.8      | 2.0       |
|                                                            |     | N      | 3        | 3         | 3        | 3         |

Table  
Individual Electroretinogram

| Test Item                                      |        | (dosage)                                                               |     | 1                      | 2     |                        |       |                        |       |
|------------------------------------------------|--------|------------------------------------------------------------------------|-----|------------------------|-------|------------------------|-------|------------------------|-------|
| μL/both eyes bi-weekly (days 1, 15, 29 and 43) |        |                                                                        |     | 10                     | 20    |                        |       |                        |       |
| Phase                                          |        | Predose 1                                                              |     |                        |       | Predose 2              |       |                        |       |
|                                                |        | Photopic Measurement - b-Wave Red Flash Cone Response - Amplitude (μV) |     |                        |       |                        |       |                        |       |
|                                                |        | Left Eye                                                               |     | Right Eye              |       | Left Eye               |       | Right Eye              |       |
| Group/Animal                                   |        | 300                                                                    | 950 | 300                    | 950   | 300                    | 950   | 300                    | 950   |
| Sex                                            | Number | (mcds/m <sup>2</sup> )                                                 |     | (mcds/m <sup>2</sup> ) |       | (mcds/m <sup>2</sup> ) |       | (mcds/m <sup>2</sup> ) |       |
| 1/M                                            | 45366M | b                                                                      | b   | 49.0                   | 110.0 | 22.9                   | 86.3  | 35.0                   | 111.0 |
|                                                | 45427M | b                                                                      | b   | 74.5                   | 101.0 | 42.5                   | 91.1  | 44.6                   | 115.0 |
|                                                | 45504M | b                                                                      | b   | 110.0                  | 173.0 | 53.5                   | 172.0 | 61.4                   | 121.0 |
|                                                | Mean   | -                                                                      | -   | 77.8                   | 128.0 | 39.6                   | 116.5 | 47.0                   | 115.7 |
|                                                | SD     | -                                                                      | -   | 30.6                   | 39.2  | 15.5                   | 48.2  | 13.4                   | 5.0   |
|                                                | N      | -                                                                      | -   | 3                      | 3     | 3                      | 3     | 3                      | 3     |
| 2/M                                            | 42737M | b                                                                      | b   | 37.8                   | 110.0 | 38.2                   | 143.0 | 31.4                   | 125.0 |
|                                                | 45370M | b                                                                      | b   | 60.5                   | 123.0 | 28.0                   | 113.0 | 13.7                   | 86.9  |
|                                                | 45500M | b                                                                      | b   | 23.8                   | 82.7  | 16.3                   | 73.9  | 24.4                   | 91.0  |
|                                                | Mean   | -                                                                      | -   | 40.7                   | 105.2 | 27.5                   | 110.0 | 23.2                   | 101.0 |
|                                                | SD     | -                                                                      | -   | 18.5                   | 20.6  | 11.0                   | 34.6  | 8.9                    | 20.9  |
|                                                | N      | -                                                                      | -   | 3                      | 3     | 3                      | 3     | 3                      | 3     |

b = Not taken due to maximum sedation time was over



Table  
Individual Electroretinogram

| Test Item    |        | (dosage)                                                               |       | 1                      | 2     |
|--------------|--------|------------------------------------------------------------------------|-------|------------------------|-------|
|              |        | μL/both eyes bi-weekly (days 1, 15, 29 and 43)                         |       | 10                     | 20    |
| Phase        |        | Dosing Week 6                                                          |       |                        |       |
|              |        | Photopic Measurement - b-Wave Red Flash Cone Response - Amplitude (μV) |       |                        |       |
|              |        | Left Eye                                                               |       | Right Eye              |       |
| Group/Animal |        | 300                                                                    | 950   | 300                    | 950   |
| Sex          | Number | (mcds/m <sup>2</sup> )                                                 |       | (mcds/m <sup>2</sup> ) |       |
| 1/M          | 45366M | 35.8                                                                   | 75.4  | 45.1                   | 108.0 |
|              | 45427M | 67.7                                                                   | 113.0 | 68.4                   | 131.0 |
|              | 45504M | 99.4                                                                   | 143.0 | 85.6                   | 127.0 |
|              | Mean   | 67.6                                                                   | 110.5 | 66.4                   | 122.0 |
|              | SD     | 31.8                                                                   | 33.9  | 20.3                   | 12.3  |
|              | N      | 3                                                                      | 3     | 3                      | 3     |
| 2/M          | 42737M | 37.4                                                                   | 123.0 | 39.2                   | 139.0 |
|              | 45370M | 35.3                                                                   | 108.0 | 40.5                   | 104.0 |
|              | 45500M | 16.1                                                                   | 58.4  | 14.3                   | 50.5  |
|              | Mean   | 29.6                                                                   | 96.5  | 31.3                   | 97.8  |
|              | SD     | 11.7                                                                   | 33.8  | 14.8                   | 44.6  |
|              | N      | 3                                                                      | 3     | 3                      | 3     |

Table  
Individual Electroretinogram

| Test Item                                      |        | (dosage)                                                                  |     | 1                      | 2    |                        |      |                        |      |
|------------------------------------------------|--------|---------------------------------------------------------------------------|-----|------------------------|------|------------------------|------|------------------------|------|
| μL/both eyes bi-weekly (days 1, 15, 29 and 43) |        |                                                                           |     | 10                     | 20   |                        |      |                        |      |
| Phase                                          |        | Predose 1                                                                 |     |                        |      | Predose 2              |      |                        |      |
|                                                |        | Photopic Measurement - b-Wave Red Flash Cone Response - Peak Latency (ms) |     |                        |      |                        |      |                        |      |
|                                                |        | Left Eye                                                                  |     | Right Eye              |      | Left Eye               |      | Right Eye              |      |
| Group/Animal                                   |        | 300                                                                       | 950 | 300                    | 950  | 300                    | 950  | 300                    | 950  |
| Sex                                            | Number | (mcds/m <sup>2</sup> )                                                    |     | (mcds/m <sup>2</sup> ) |      | (mcds/m <sup>2</sup> ) |      | (mcds/m <sup>2</sup> ) |      |
| 1/M                                            | 45366M | -                                                                         | -   | 22.2                   | 20.9 | 23.2                   | 22.0 | 23.3                   | 21.7 |
|                                                | 45427M | -                                                                         | -   | 22.6                   | 23.4 | 23.9                   | 23.0 | 23.7                   | 22.7 |
|                                                | 45504M | -                                                                         | -   | 22.2                   | 21.2 | 24.7                   | 22.5 | 23.8                   | 22.4 |
|                                                | Mean   | -                                                                         | -   | 22.3                   | 21.8 | 23.9                   | 22.5 | 23.6                   | 22.3 |
|                                                | SD     | -                                                                         | -   | 0.2                    | 1.4  | 0.8                    | 0.5  | 0.3                    | 0.5  |
|                                                | N      | -                                                                         | -   | 3                      | 3    | 3                      | 3    | 3                      | 3    |
| 2/M                                            | 42737M | -                                                                         | -   | 22.5                   | 21.1 | 21.1                   | 20.5 | 21.0                   | 20.5 |
|                                                | 45370M | -                                                                         | -   | 23.2                   | 21.3 | 28.5                   | 25.0 | 27.1                   | 26.0 |
|                                                | 45500M | -                                                                         | -   | 25.8                   | 22.7 | 24.9                   | 23.3 | 25.4                   | 23.1 |
|                                                | Mean   | -                                                                         | -   | 23.8                   | 21.7 | 24.8                   | 22.9 | 24.5                   | 23.2 |
|                                                | SD     | -                                                                         | -   | 1.7                    | 0.9  | 3.7                    | 2.3  | 3.1                    | 2.8  |
|                                                | N      | -                                                                         | -   | 3                      | 3    | 3                      | 3    | 3                      | 3    |

Table  
Individual Electroretinogram

| Test Item                                      |        | (dosage)                                                                  |      | 1                      | 2    |
|------------------------------------------------|--------|---------------------------------------------------------------------------|------|------------------------|------|
| μL/both eyes bi-weekly (days 1, 15, 29 and 43) |        |                                                                           |      | 10                     | 20   |
| Phase                                          |        | Dosing Week 6                                                             |      |                        |      |
|                                                |        | Photopic Measurement - b-Wave Red Flash Cone Response - Peak Latency (ms) |      |                        |      |
|                                                |        | Left Eye                                                                  |      | Right Eye              |      |
| Group/Animal                                   |        | 300                                                                       | 950  | 300                    | 950  |
| Sex                                            | Number | (mcds/m <sup>2</sup> )                                                    |      | (mcds/m <sup>2</sup> ) |      |
| 1/M                                            | 45366M | 24.1                                                                      | 22.9 | 24.7                   | 23.5 |
|                                                | 45427M | 22.2                                                                      | 22.4 | 22.9                   | 22.3 |
|                                                | 45504M | 21.3                                                                      | 21.9 | 22.2                   | 22.2 |
|                                                | Mean   | 22.5                                                                      | 22.4 | 23.3                   | 22.7 |
|                                                | SD     | 1.4                                                                       | 0.5  | 1.3                    | 0.7  |
|                                                | N      | 3                                                                         | 3    | 3                      | 3    |
| 2/M                                            | 42737M | 21.7                                                                      | 21.5 | 21.4                   | 21.2 |
|                                                | 45370M | 28.5                                                                      | 25.6 | 27.5                   | 25.2 |
|                                                | 45500M | 27.8                                                                      | 27.8 | 24.3                   | 25.0 |
|                                                | Mean   | 26.0                                                                      | 25.0 | 24.4                   | 23.8 |
|                                                | SD     | 3.7                                                                       | 3.2  | 3.1                    | 2.3  |
|                                                | N      | 3                                                                         | 3    | 3                      | 3    |

Table  
Individual Electroretinogram

| Test Item (dosage)                             |            | 1                                                                                   |           | 2                 |           |                |           |                   |           |
|------------------------------------------------|------------|-------------------------------------------------------------------------------------|-----------|-------------------|-----------|----------------|-----------|-------------------|-----------|
| µL/both eyes bi-weekly (days 1, 15, 29 and 43) |            | 10                                                                                  |           | 20                |           |                |           |                   |           |
| Phase                                          |            | Predose 1                                                                           |           |                   |           | Predose 2      |           |                   |           |
|                                                |            | Photopic Measurement - b-Wave White Flash Cone Response (3000 mcDs/m <sup>2</sup> ) |           |                   |           |                |           |                   |           |
|                                                |            | Amplitude (µV)                                                                      |           | Peak Latency (ms) |           | Amplitude (µV) |           | Peak Latency (ms) |           |
| Group/Animal                                   | Sex Number | Left Eye                                                                            | Right Eye | Left Eye          | Right Eye | Left Eye       | Right Eye | Left Eye          | Right Eye |
| 1/M                                            | 45366M     | b                                                                                   | 179.0     | b                 | 25.9      | 125.0          | 163.0     | 25.4              | 25.4      |
|                                                | 45427M     | b                                                                                   | 193.0     | b                 | 27.5      | 143.0          | 171.0     | 26.3              | 26.1      |
|                                                | 45504M     | b                                                                                   | 295.0     | b                 | 25.3      | 223.0          | 196.0     | 26.8              | 26.8      |
|                                                | Mean       | -                                                                                   | 222.3     | -                 | 26.2      | 163.7          | 176.7     | 26.2              | 26.1      |
|                                                | SD         | -                                                                                   | 63.3      | -                 | 1.1       | 52.2           | 17.2      | 0.7               | 0.7       |
|                                                | N          | -                                                                                   | 3         | -                 | 3         | 3              | 3         | 3                 | 3         |
| 2/M                                            | 42737M     | b                                                                                   | 210.0     | b                 | 25.1      | 282.0          | 258.0     | 23.4              | 23.1      |
|                                                | 45370M     | b                                                                                   | 221.0     | b                 | 25.3      | a              | a         | a                 | a         |
|                                                | 45500M     | b                                                                                   | 144.0     | b                 | 26.7      | 123.0          | 145.0     | 25.1              | 25.1      |
|                                                | Mean       | -                                                                                   | 191.7     | -                 | 25.7      | 202.5          | 201.5     | 24.3              | 24.1      |
|                                                | SD         | -                                                                                   | 41.6      | -                 | 0.9       | 112.4          | 79.9      | 1.2               | 1.4       |
|                                                | N          | -                                                                                   | 3         | -                 | 3         | 2              | 2         | 2                 | 2         |

a = No measurement

b = Not taken due to maximum sedation time was over

Table  
Individual Electroretinogram

| Test Item (dosage)                                                                  |        | 1              | 2         |                   |           |
|-------------------------------------------------------------------------------------|--------|----------------|-----------|-------------------|-----------|
| µL/both eyes bi-weekly (days 1, 15, 29 and 43)                                      |        | 10             | 20        |                   |           |
| Phase                                                                               |        | Dosing Week 6  |           |                   |           |
| Photopic Measurement - b-Wave White Flash Cone Response (3000 mcds/m <sup>2</sup> ) |        |                |           |                   |           |
| Group/Animal                                                                        |        | Amplitude (µV) |           | Peak Latency (ms) |           |
| Sex                                                                                 | Number | Left Eye       | Right Eye | Left Eye          | Right Eye |
| 1/M                                                                                 | 45366M | 121.0          | 169.0     | 27.2              | 27.7      |
|                                                                                     | 45427M | 200.0          | 223.0     | 26.1              | 26.1      |
|                                                                                     | 45504M | 286.0          | 234.0     | 25.8              | 26.2      |
|                                                                                     | Mean   | 202.3          | 208.7     | 26.4              | 26.7      |
|                                                                                     | SD     | 82.5           | 34.8      | 0.7               | 0.9       |
|                                                                                     | N      | 3              | 3         | 3                 | 3         |
| 2/M                                                                                 | 42737M | 242.0          | 279.0     | 24.5              | 24.0      |
|                                                                                     | 45370M | 163.0          | 166.0     | 30.4              | 30.3      |
|                                                                                     | 45500M | 132.0          | 124.0     | 28.5              | 28.3      |
|                                                                                     | Mean   | 179.0          | 189.7     | 27.8              | 27.5      |
|                                                                                     | SD     | 56.7           | 80.2      | 3.0               | 3.2       |
|                                                                                     | N      | 3              | 3         | 3                 | 3         |

Table  
Individual Electroretinogram

|              |            | Test Item (dosage)                             |           |                   |           |                                                 |           |                   |           | 1        | 2         |
|--------------|------------|------------------------------------------------|-----------|-------------------|-----------|-------------------------------------------------|-----------|-------------------|-----------|----------|-----------|
|              |            | µL/both eyes bi-weekly (days 1, 15, 29 and 43) |           |                   |           |                                                 |           |                   |           | 10       | 20        |
| Phase        |            | Predose 1                                      |           |                   |           | Predose 2                                       |           |                   |           |          |           |
|              |            | Photopic Measurement - a-Wave White            |           |                   |           | Flash Cone Response (3000 mcDs/m <sup>2</sup> ) |           |                   |           |          |           |
|              |            | Amplitude (µV)                                 |           | Peak Latency (ms) |           | Amplitude (µV)                                  |           | Peak Latency (ms) |           |          |           |
| Group/Animal | Sex Number | Left Eye                                       | Right Eye | Left Eye          | Right Eye | Left Eye                                        | Right Eye | Left Eye          | Right Eye | Left Eye | Right Eye |
| 1/M          | 45366M     | b                                              | 35.0      | b                 | 14.8      | 29.5                                            | 36.3      | 14.8              | 14.8      |          |           |
|              | 45427M     | b                                              | 42.6      | b                 | 14.4      | 45.2                                            | 52.6      | 15.7              | 15.5      |          |           |
|              | 45504M     | b                                              | 48.3      | b                 | 14.2      | 34.0                                            | 55.2      | 15.9              | 15.2      |          |           |
|              | Mean       | -                                              | 42.0      | -                 | 14.5      | 36.2                                            | 48.0      | 15.5              | 15.2      |          |           |
|              | SD         | -                                              | 6.7       | -                 | 0.3       | 8.1                                             | 10.2      | 0.6               | 0.4       |          |           |
|              | N          | -                                              | 3         | -                 | 3         | 3                                               | 3         | 3                 | 3         |          |           |
| 2/M          | 42737M     | b                                              | 41.2      | b                 | 14.3      | 58.1                                            | 52.2      | 14.2              | 14.2      |          |           |
|              | 45370M     | b                                              | 57.6      | b                 | 14.6      | a                                               | a         | a                 | a         |          |           |
|              | 45500M     | b                                              | 37.8      | b                 | 14.8      | 37.1                                            | 44.8      | 15.6              | 15.6      |          |           |
|              | Mean       | -                                              | 45.5      | -                 | 14.6      | 47.6                                            | 48.5      | 14.9              | 14.9      |          |           |
|              | SD         | -                                              | 10.6      | -                 | 0.3       | 14.8                                            | 5.2       | 1.0               | 1.0       |          |           |
|              | N          | -                                              | 3         | -                 | 3         | 2                                               | 2         | 2                 | 2         |          |           |

a = No measurement

b = Not taken due to maximum sedation time was over

Table  
Individual Electroretinogram

| Test Item                                                                           |        | (dosage)                          |           | 1                 | 2         |
|-------------------------------------------------------------------------------------|--------|-----------------------------------|-----------|-------------------|-----------|
| μL/both eyes                                                                        |        | bi-weekly (days 1, 15, 29 and 43) |           | 10                | 20        |
| Phase                                                                               |        | Dosing Week 6                     |           |                   |           |
| Photopic Measurement - a-Wave White Flash Cone Response (3000 mcds/m <sup>2</sup> ) |        |                                   |           |                   |           |
| Group/Animal                                                                        |        | Amplitude (μV)                    |           | Peak Latency (ms) |           |
| Sex                                                                                 | Number | Left Eye                          | Right Eye | Left Eye          | Right Eye |
| 1/M                                                                                 | 45366M | 26.0                              | 36.5      | 15.4              | 15.9      |
|                                                                                     | 45427M | 47.0                              | 54.2      | 14.5              | 15.0      |
|                                                                                     | 45504M | 41.5                              | 35.8      | 14.1              | 14.1      |
|                                                                                     | Mean   | 38.2                              | 42.2      | 14.7              | 15.0      |
|                                                                                     | SD     | 10.9                              | 10.4      | 0.7               | 0.9       |
|                                                                                     | N      | 3                                 | 3         | 3                 | 3         |
| 2/M                                                                                 | 42737M | 50.9                              | 56.6      | 14.8              | 14.6      |
|                                                                                     | 45370M | 57.5                              | 52.2      | 17.4              | 17.3      |
|                                                                                     | 45500M | 31.6                              | 25.7      | 15.9              | 16.1      |
|                                                                                     | Mean   | 46.7                              | 44.8      | 16.0              | 16.0      |
|                                                                                     | SD     | 13.5                              | 16.7      | 1.3               | 1.4       |
|                                                                                     | N      | 3                                 | 3         | 3                 | 3         |
